# Supplementary material for: Association between Fecal Microbiota, SCFA, Gut Integrity Markers and Depressive Symptoms in Patients Treated in the Past with Bariatric Surgery—The Cross-Sectional Study
Source: MDPI journal article supplement (doi:10.3390/nu14245372), 2022-12-17
Supplement: s1 [file s1]

**Supplementary Table S1.** Descriptive statistics of all variables used in the study.

| Parameters               | Mean   | SD     | Median | Min    | Max    | Range   | Skewness | Kurtosis | SE    |
|--------------------------|--------|--------|--------|--------|--------|---------|----------|----------|-------|
| Waist [cm]               | 97.86  | 12.82  | 97.5   | 71     | 122    | 51      | −0.12    | −0.89    | 2.03  |
| WHR                      | 0.86   | 0.09   | 0.85   | 0.67   | 1.06   | 0.39    | 0.27     | −0.17    | 0.01  |
| Body mass [kg]           | 88.02  | 17.4   | 86.6   | 62.1   | 125.7  | 63.6    | 0.52     | −0.78    | 2.75  |
| FFM [kg]                 | 58.05  | 10.08  | 56.8   | 44.7   | 88.2   | 43.5    | 0.83     | 0.25     | 1.59  |
| FM [kg]                  | 30.66  | 10.1   | 29.05  | 14.1   | 54.1   | 40      | 0.52     | −0.43    | 1.6   |
| BMI [kg/m <sup>2</sup> ] | 30.66  | 5.13   | 30.3   | 20     | 40.5   | 20.5    | 0.22     | −0.62    | 0.81  |
| Beck's scale             | 18.42  | 7.63   | 17     | 12     | 44     | 32      | 1.47     | 2.01     | 1.21  |
| Hamilton's scale         | 12.94  | 4.7    | 13     | 5      | 24     | 19      | 0.13     | −0.66    | 0.79  |
| Athenian insomnia scale  | 10.11  | 4      | 10     | 1      | 19     | 18      | 0.01     | −0.24    | 0.68  |
| LBP [ng/ml]              | 594.09 | 196.81 | 528.12 | 363.98 | 1467.2 | 1103.22 | 2.49     | 7.79     | 31.12 |
| LPS [pg/ml]              | 102.09 | 34.66  | 97.84  | 55.29  | 206.64 | 151.35  | 0.93     | 0.42     | 5.48  |
| Fecal zonulin [ng/ml]    | 137.05 | 73.54  | 119.29 | 37.79  | 345.06 | 307.27  | 0.86     | 0.2      | 13.66 |
| Occludin [ng/ml]         | 13.77  | 3.41   | 12.94  | 6.5    | 25.52  | 19.02   | 1.07     | 1.87     | 0.54  |
| C 2:0                    | 33.01  | 5.25   | 32.44  | 21.8   | 43.6   | 21.8    | 0.15     | −0.74    | 0.85  |
| C 3:0                    | 21.57  | 5.79   | 21.86  | 10.53  | 39.29  | 28.76   | 0.36     | 0.56     | 0.94  |
| C 4:0i                   | 4.74   | 1.71   | 4.49   | 2.11   | 8.33   | 6.23    | 0.44     | −0.82    | 0.28  |
| C 4:0n                   | 22.75  | 7.06   | 22.75  | 10.15  | 39.92  | 27.77   | −0.07    | −0.95    | 1.15  |
| C 5:0i                   | 8.96   | 3.87   | 8.47   | 3.16   | 18.63  | 15.47   | 0.68     | −0.4     | 0.63  |
| C 5:0n                   | 6.09   | 1.9    | 6.4    | 0.85   | 9.59   | 8.75    | −0.79    | 0.93     | 0.31  |
| DQI-I                    | 47.45  | 8.32   | 47     | 35     | 71     | 36      | 0.56     | −0.05    | 1.32  |
| Diversity                | 9.9    | 4.72   | 10     | 3      | 20     | 17      | 0.25     | −0.59    | 0.75  |
| Adequacy                 | 22.55  | 3.46   | 23     | 15     | 29     | 14      | −0.25    | −0.73    | 0.55  |
| Moderation               | 14.4   | 4.52   | 15     | 6      | 24     | 18      | −0.46    | −0.81    | 0.71  |
| Overall diet balance     | 0.6    | 1.45   | 0      | 0      | 8      | 8       | 3.47     | 14.32    | 0.23  |

SD – standard deviation, SE – standard error, Range – Max – Min.

**Supplementary Table S2.** Steps of the RDA analysis – variable selectin process.

| Round 1.           |        |          | Round 2            |        |        | Round 3               |        |         | Round 4                               |        |         |
|--------------------|--------|----------|--------------------|--------|--------|-----------------------|--------|---------|---------------------------------------|--------|---------|
|                    | F      | P        | SCFAC2 +           | F      | P      | SCFAC2 +<br>SCFAC4i + | F      | P       | SCFAC2 +<br>SCFAC4i +<br>Beck scale + | F      | P       |
| Surgery type       | 1.6356 | 5.00E-05 | Surgery type       | 1.1062 | 0.1881 | Surgery type          | 1.1163 | 0.16891 | Surgery type                          | 1.1178 | 0.16523 |
| Digestive symptoms | 1.0316 | 0.3342   | Digestive symptoms | 1.0497 | 0.2733 | Digestive symptoms    | 1.0375 | 0.3128  | Digestive symptoms                    | 0.9968 | 0.47673 |
| Abdominal pain     | 1.0543 | 0.2858   | Abdominal pain     | 1.1198 | 0.1471 | Abdominal pain        | 1.1228 | 0.14283 | Abdominal pain                        | 1.077  | 0.23912 |
| Bloating           | 1.0654 | 0.3476   | Bloating           | 1.0113 | 0.4412 | Bloating              | 1.0125 | 0.4398  | Bloating                              | 0.9911 | 0.47833 |
| Heart burn         | 1.0215 | 0.3933   | Heart burn         | 1.0595 | 0.2915 | Heart burn            | 1.0665 | 0.2753  | Heart burn                            | 1.1039 | 0.1964  |
| Nausea             | 0.839  | 0.8728   | Nausea             | 0.8636 | 0.8227 | Nausea                | 0.8633 | 0.8254  | Nausea                                | 0.8503 | 0.8544  |

|                      |               |                 |                      |               |                |                      |               |                |                      |        |         |
|----------------------|---------------|-----------------|----------------------|---------------|----------------|----------------------|---------------|----------------|----------------------|--------|---------|
| Defecation problem   | 1.0215        | 0.3726          | Defecation problem   | 0.9777        | 0.5597         | Defecation problem   | 0.9835        | 0.535          | Defecation problem   | 0.9627 | 0.61931 |
| Diarrhoea            | 0.9778        | 0.5391          | Diarrhoea            | 0.993         | 0.4865         | Diarrhoea            | 0.9675        | 0.5752         | Diarrhoea            | 0.9496 | 0.64024 |
| Constipation         | 1.1728        | 0.07281         | Constipation         | 1.0961        | 0.1878         | Constipation         | 1.1026        | 0.17574        | Constipation         | 1.1088 | 0.1639  |
| Age                  | 1.0876        | 0.2211          | Age                  | 1.0286        | 0.3784         | Age                  | 0.9867        | 0.51949        | Age                  | 0.9866 | 0.52182 |
| Beck scale           | 1.2185        | 0.05855         | Beck scale           | 1.1986        | 0.06947        | <b>Beck scale</b>    | <b>1.2235</b> | <b>0.05585</b> |                      |        |         |
| BMI                  | 0.9947        | 0.4904          | BMI                  | 1.0007        | 0.4693         | BMI                  | 0.96          | 0.60522        | BMI                  | 0.9619 | 0.60175 |
| Months after surgery | 1.0339        | 0.3742          | Months after surgery | 1.0495        | 0.3349         | Months after surgery | 1.0496        | 0.33277        | Months after surgery | 1.0496 | 0.33272 |
| LBP                  | 1.0352        | 0.3608          | LBP                  | 1.0442        | 0.3357         | LBP                  | 1.0596        | 0.29357        | LBP                  | 1.0404 | 0.34611 |
| LPS                  | 0.9558        | 0.634           | LPS                  | 0.9645        | 0.5992         | LPS                  | 0.9768        | 0.55337        | LPS                  | 0.9912 | 0.50366 |
| Homocysteine         | 1.1052        | 0.1946          | Homocysteine         | 1.0823        | 0.2358         | Homocysteine         | 0.9762        | 0.5439         | Homocysteine         | 0.9732 | 0.55292 |
| Occludin             | 1.0314        | 0.3791          | Occludin             | 1.0247        | 0.3974         | Occludin             | 1.0368        | 0.36497        | Occludin             | 1.0456 | 0.33783 |
| Vitamin D            | 1.0476        | 0.3198          | Vitamin D            | 1.0672        | 0.2632         | Vitamin D            | 1.1556        | 0.08927        | Vitamin D            | 1.1636 | 0.08147 |
| Waist                | 1.1209        | 0.141           | Waist                | 1.1318        | 0.1249         | Waist                | 1.0674        | 0.2679         | Waist                | 1.0743 | 0.24952 |
| WHR                  | 1.1109        | 0.1743          | WHR                  | 1.0978        | 0.1984         | WHR                  | 1.0771        | 0.2434         | WHR                  | 1.0859 | 0.22391 |
| Weight               | 1.0641        | 0.2698          | Weight               | 1.0688        | 0.2605         | Weight               | 1.002         | 0.46053        | Weight               | 1.0086 | 0.44286 |
| LBM                  | 1.1702        | 0.1163          | LBM                  | 1.1447        | 0.1484         | LBM                  | 1.0784        | 0.2514         | LBM                  | 1.0892 | 0.22809 |
| Fat mass             | 0.954         | 0.6351          | Fat mass             | 0.9757        | 0.5573         | Fat mass             | 0.945         | 0.65729        | Fat mass             | 0.9506 | 0.63922 |
| <b>SCFAC2</b>        | <b>1.6829</b> | <b>2.00E-05</b> |                      |               |                |                      |               |                |                      |        |         |
| SCFAC3               | 1.3945        | 0.00165         | SCFAC3               | 1.1881        | 0.06222        | SCFAC3               |               |                | SCFAC3               | 1.1137 | 0.14736 |
| SCFAC4i              | 1.5113        | 0.00026         | <b>SCFAC4i</b>       | <b>1.5466</b> | <b>0.00015</b> |                      | 1.0892        | 0.2009         |                      |        |         |
| SCFAC4n              | 1.2597        | 0.02084         | SCFAC4n              | 1.1091        | 0.1756         | SCFAC4n              | 0.9604        | 0.6185         | SCFAC4n              | 0.9906 | 0.5062  |
| SCFAC5n              | 1.1556        | 0.1218          | SCFAC5n              | 1.2143        | 0.0608         | SCFAC5n              | 1.2558        | 0.05656        | SCFAC5n              | 1.2622 | 0.05438 |

**Supplementary Table S3.** The coefficients of determination ( $R^2$ ) and P values from regression analysis of variables (vectors or factors) with nMDS ordination scores using envfit function (vegan package).

| Variable (Vectors or Factors) | $R^2$  | $p$     |
|-------------------------------|--------|---------|
| Age                           | 0.0156 | 0.88954 |
| Beck scale                    | 0.0044 | 0.9688  |
| Waist                         | 0.0116 | 0.91805 |
| WHR                           | 0.0517 | 0.67083 |
| Weight                        | 0.0256 | 0.8282  |
| LBM                           | 0.0297 | 0.80112 |
| Fat mass                      | 0.0237 | 0.84085 |
| BMI                           | 0.047  | 0.70326 |
| Months after surgery          | 0.008  | 0.93631 |
| LBP                           | 0.0477 | 0.69721 |
| LPS                           | 0.3086 | 0.05812 |
| Homocysteine                  | 0.1261 | 0.3662  |
| Zonulin                       | 0.28   | 0.08667 |
| Occludin                      | 0.1644 | 0.25871 |
| Vitamin D                     | 0.0881 | 0.50351 |
| SCFAC2                        | 0.1717 | 0.24236 |
| SCFAC3                        | 0.1776 | 0.23172 |

|                    |        |         |
|--------------------|--------|---------|
| SCFAC4i            | 0.4047 | 0.01935 |
| SCFAC4n            | 0.4046 | 0.01989 |
| SCFAC5i            | 0.2614 | 0.10216 |
| SCFAC5n            | 0.0642 | 0.59377 |
| Surgery type       | 0.0546 | 0.42767 |
| Digestive symptoms | 0.2243 | 0.00986 |
| Abdominal pain     | 0.0806 | 0.25485 |
| Bloating           | 0.125  | 0.16489 |
| Heart burn         | 0.1335 | 0.09068 |
| Nausea             | 0.046  | 0.38899 |
| Defecation problem | 0.0867 | 0.24193 |
| Diarrhoea          | 0.04   | 0.54347 |
| Constipation       | 0.0533 | 0.41512 |

Supplementary Table S4. BMI of patients enrolled in the study.

| BMI Range (kg/m <sup>2</sup> ) | Number of Patients |
|--------------------------------|--------------------|
| BMI <18.5                      | 0                  |
| BMI ≥ 18.5 & BMI <25           | 6                  |
| BMI ≥ 25 & BMI <30             | 13                 |
| BMI ≥30                        | 22                 |
| BMI ≥30 & BMI <35              | 13                 |
| BMI ≥35 & BMI <40              | 6                  |
| BMI ≥40                        | 3                  |
